# Supplementary material for: Biosynthesis of irregular diterpenes in Anisotome lyallii by head-to-head coupling of geranyl diphosphate
Source: Royal Society of Chemistry journal article supplement (doi:10.1039/b416391e), 2005-01-01
Supplement: b416391e.pdf [file b416391e.pdf]

Paper Ref.: B416391E:

**Title:** Biosynthesis of irregular diterpenes in *Anisotome lyallii* by head-to-head coupling of geranyl diphosphate

**Corresponding Author:** John W. van Klink

**Supplementary Data:**

Table S1:  $^{13}\text{C}$  abundances of labelled anisotomoic acid **1**<sup>a</sup>

| carbon atom | $\delta_{\text{C}}$ | % $^{13}\text{C}$     |
|-------------|---------------------|-----------------------|
| <b>1</b>    | 178.0               | <b>100</b>            |
| 2           | 48.3                | 75                    |
| <b>3</b>    | 31.4                | <b>101</b>            |
| 4           | 143.9               | 84                    |
| 5           | 116.2               | 78                    |
| <b>6</b>    | 20.9                | <b>99</b>             |
| 7           | 35.2                | 73                    |
| 8           | 35.6                | 82                    |
| 9           | 49.7                | 80                    |
| 10          | 52.2                | 80                    |
| 11          | 40.5                | 77                    |
| <b>12</b>   | 22.6                | <b>94</b>             |
| 13          | 124.0               | 84                    |
| 14          | 129.9               | 85                    |
| 15          | 24.6                | 60 <sup>c</sup>       |
| <b>16</b>   | 16.6                | <b>98<sup>b</sup></b> |
| 17          | 27.5                | 80                    |
| <b>18</b>   | 24.8                | <b>94<sup>c</sup></b> |
| <b>19</b>   | 18.8                | <b>91</b>             |
| <b>20</b>   | 16.6                | <b>98<sup>b</sup></b> |

<sup>a</sup> data recorded at 500 MHz in  $\text{CHCl}_3$  at 45°C

<sup>b</sup> coincidental signals, integral are an average

<sup>c</sup> integration resolved by deconvolution (line fitting) of close signals

**bold type:** specifically labelled positions

Table S2:  $^{13}\text{C}$  abundances of phytol **4**<sup>a,b</sup>

| carbon atom <sup>c</sup> | $\delta_{\text{C}}$ | % $^{13}\text{C}$ <sup>c</sup> |
|--------------------------|---------------------|--------------------------------|
| <b>1</b>                 | 59.4                | <b>2.28</b>                    |
| 2                        | 123.1               | 1.57                           |
| 3                        | 140.2               | 1.62                           |
| 4                        | 39.9                | 1.52                           |
| <b>5</b>                 | 25.1                | <b>2.16</b>                    |
| 6                        | 36.7                | 1.58                           |
| 7                        | 32.7                | 1.77                           |
| 8                        | 37.4                | 1.69 <sup>d</sup>              |
| <b>9</b>                 | 24.5                | <b>2.34</b>                    |
| 10                       | 37.4                | 1.69 <sup>d</sup>              |
| 11                       | 32.8                | 1.72                           |
| 12                       | 37.3                | 1.69 <sup>d</sup>              |
| <b>13</b>                | 24.8                | <b>2.38</b>                    |
| 14                       | 39.6                | 1.59                           |
| 15                       | 28.0                | 1.71                           |
| 16                       | 22.6                | 1.73                           |
| <b>17</b>                | 22.7                | <b>2.25</b>                    |
| <b>18</b>                | 19.7                | <b>2.53</b> <sup>e</sup>       |
| <b>19</b>                | 19.7                | <b>2.53</b> <sup>e</sup>       |
| <b>20</b>                | 16.1                | <b>1.98</b>                    |

<sup>a</sup> data recorded at 500 MHz in  $\text{CDCl}_3$  at 25 °C

<sup>b</sup> assignments based on that reported in reference 10 and those therein.

<sup>c</sup>  $^{13}\text{C}$  abundances referenced to C-20 from the  $^{13}\text{C}$  satellite analysis of H-20

<sup>d</sup> & <sup>e</sup> averaged values due to signal overlapping

**bold type:** specifically labelled positions
